# Supplementary material for: Effects of PPARα pathway on hepatic lipid metabolism in non-alcoholic fatty liver disease rat model
Source: Research Square preprint supplement (doi:10.21203/rs.3.rs-1889607/v1), 2022-08-01
Supplement: Supplementary file 1 [file 846ae10ac2a4d10a3b8670bc.pdf]

27 **Supplementary Figure 1.**

28 A  $\beta$ -actin (42 kDa)

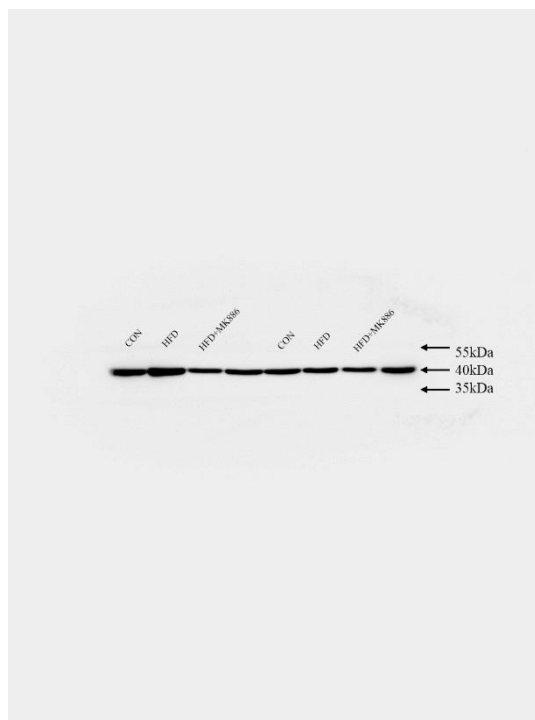

B PPAR $\alpha$  (52 kDa)

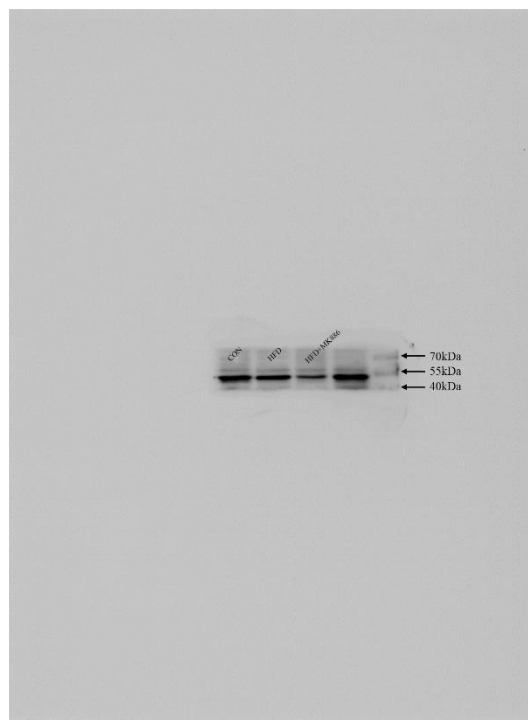

29

30 C FABP1 (47 kDa)

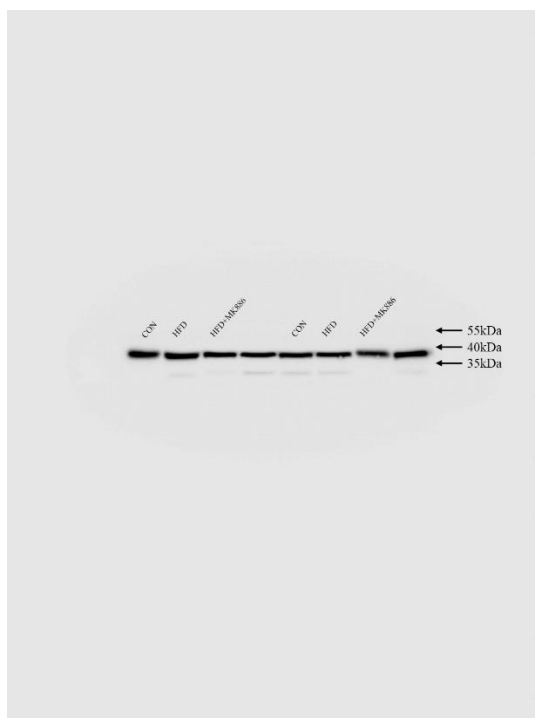

31

32

D

CPT1A (86 kDa)

E

CD36 (52 kDa)

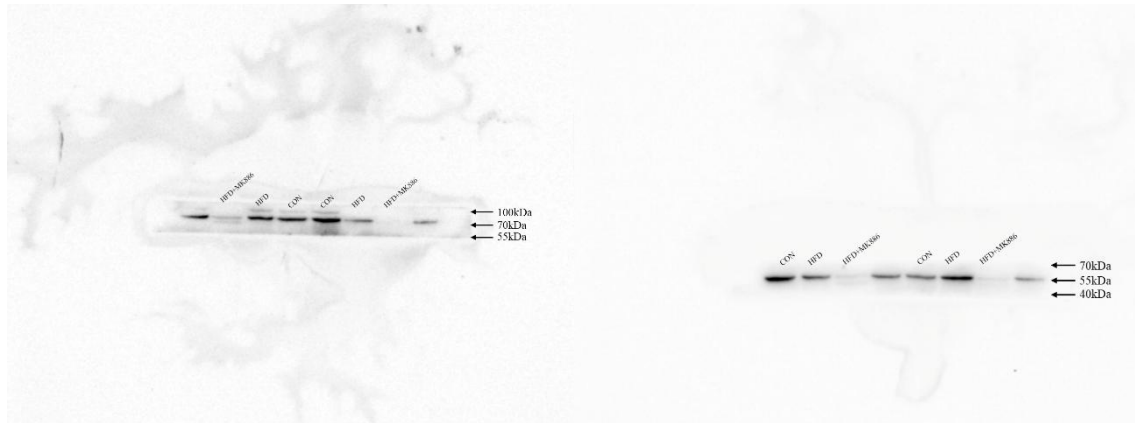

33

34 **Supplementary Fig.1 Full image of western blot for  $\beta$ -actin, PPAR $\alpha$ , FABP1, CD36, CPT1A**  
35 **in CON, HFD, HFD+MK886 group.**

36 A. Western blot for  $\beta$ -actin in CON, HFD, HFD+MK886 group.

37 B. Western blot for PPAR $\alpha$  in CON, HFD, HFD+MK886 group.

38 C. Western blot for FABP1 in CON, HFD, HFD+MK886 group.

39 D. Western blot for CPT1A in CON, HFD, HFD+MK886 group.

40 E. Western blot for CD36 in CON, HFD, HFD+MK886 group.
